# Supplementary material for: Dynamics of BMP signaling and distribution during zebrafish dorsal-ventral patterning
Source: eLife journal article supplement (doi:10.7554/elife.25861), 2017-08-31
Supplement: supp [file elife-25861-supp-v1.zip]

Archive with 15 entries (15 files):
- elife_poa_e25861_Movie_4.avi
- elife_poa_e25861_Movie_6.avi
- elife_poa_e25861_Movie_10.avi
- elife_poa_e25861_Figure_3_figure_supplement_2.pdf
- elife_poa_e25861_Movie_8.avi
- elife_poa_e25861_Transparent_Reporting_File.pdf
- elife_poa_e25861_Figure_1_figure_supplement_1.pdf
- elife_poa_e25861_Movie_1.avi
- elife_poa_e25861_Movie_9.avi
- elife_poa_e25861_Movie_2.avi
- elife_poa_e25861_Movie_7.avi
- elife_poa_e25861_Figure_3_figure_supplement_1.pdf
- elife_poa_e25861_Movie_5.avi
- elife_poa_e25861_Figure_4_figure_supplement_1.pdf
- elife_poa_e25861_Movie_3.avi
