# Supplementary figures and images for: Dynamics of BMP signaling and distribution during zebrafish dorsal-ventral patterning
Source: eLife journal article supplement (doi:10.7554/elife.25861), 2017-08-31

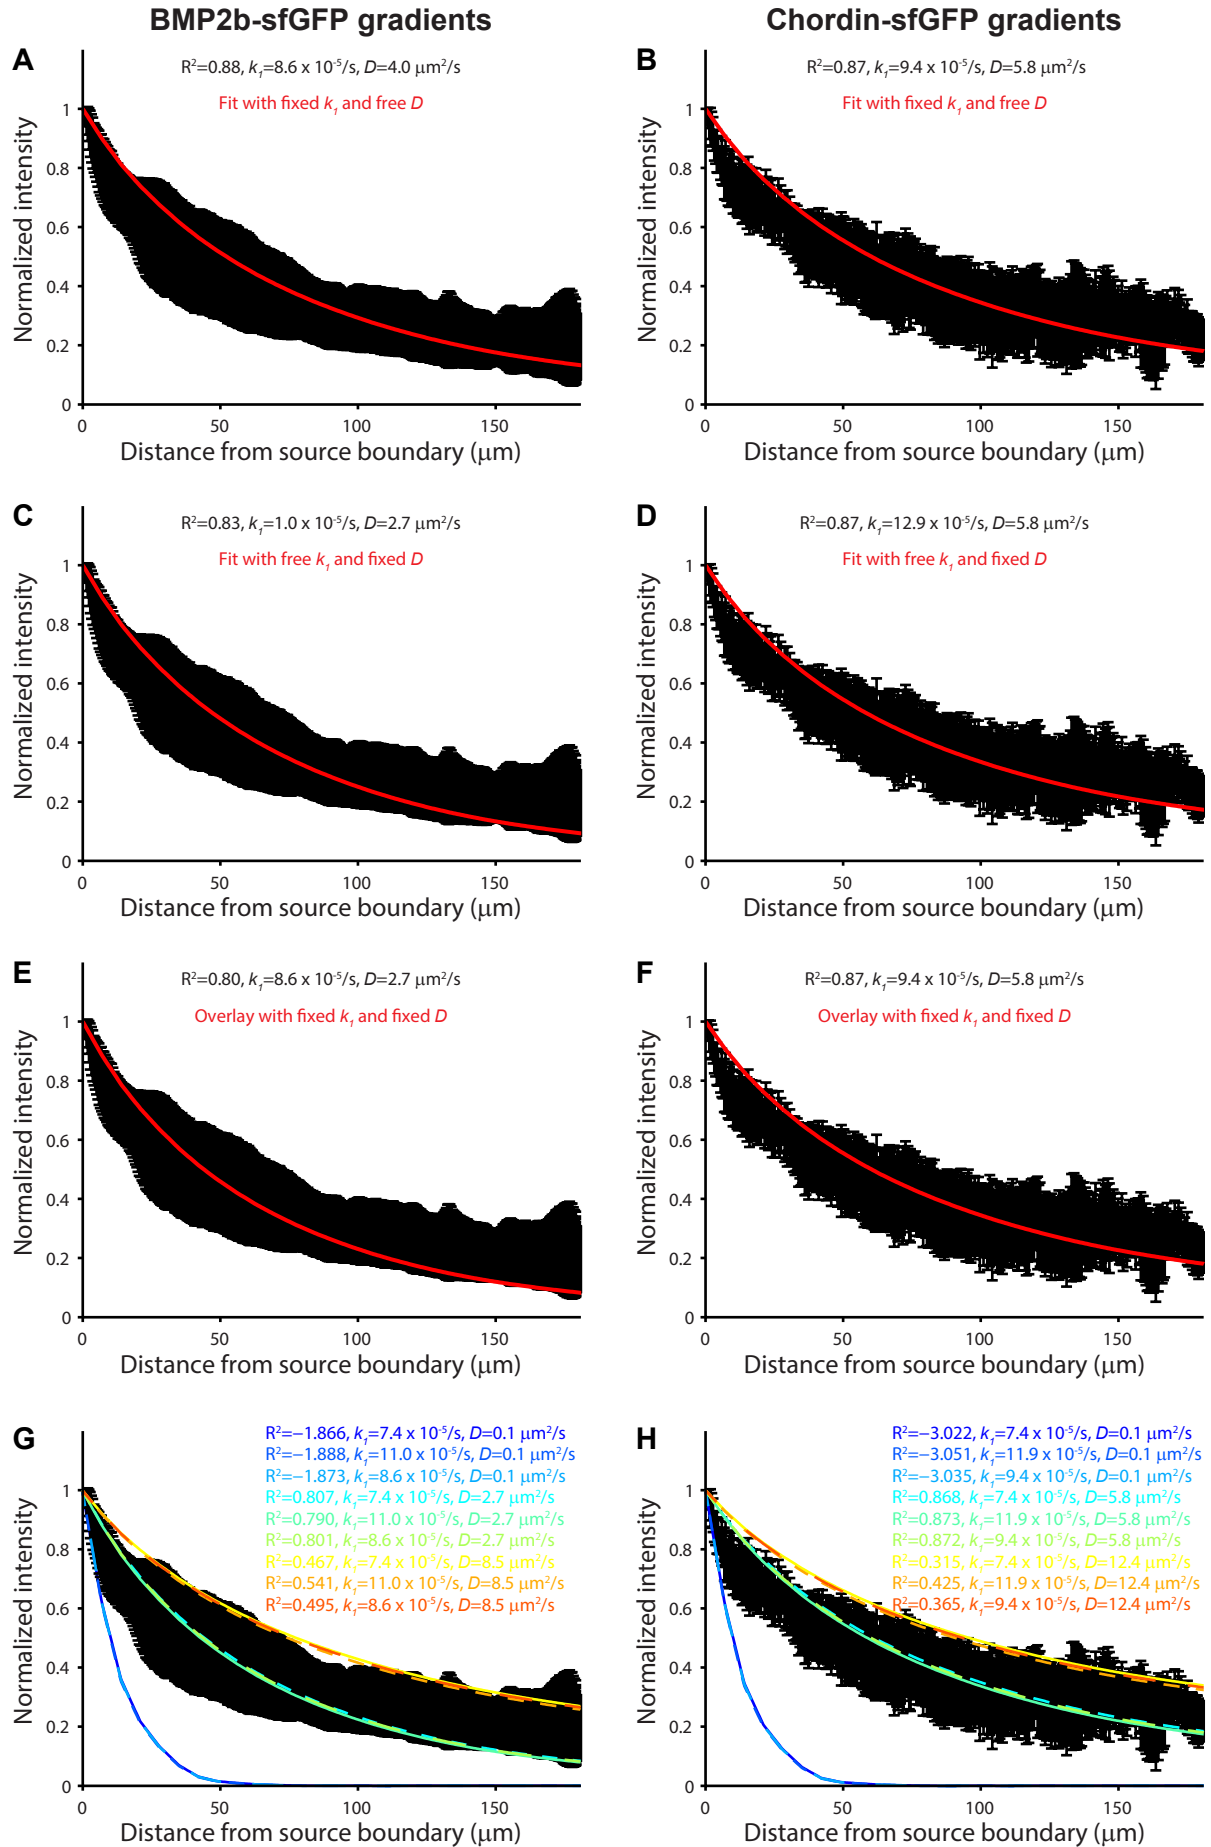

Figure 3 - figure supplement 2

Supplement: supp [file elife-25861-supp-v1.zip]

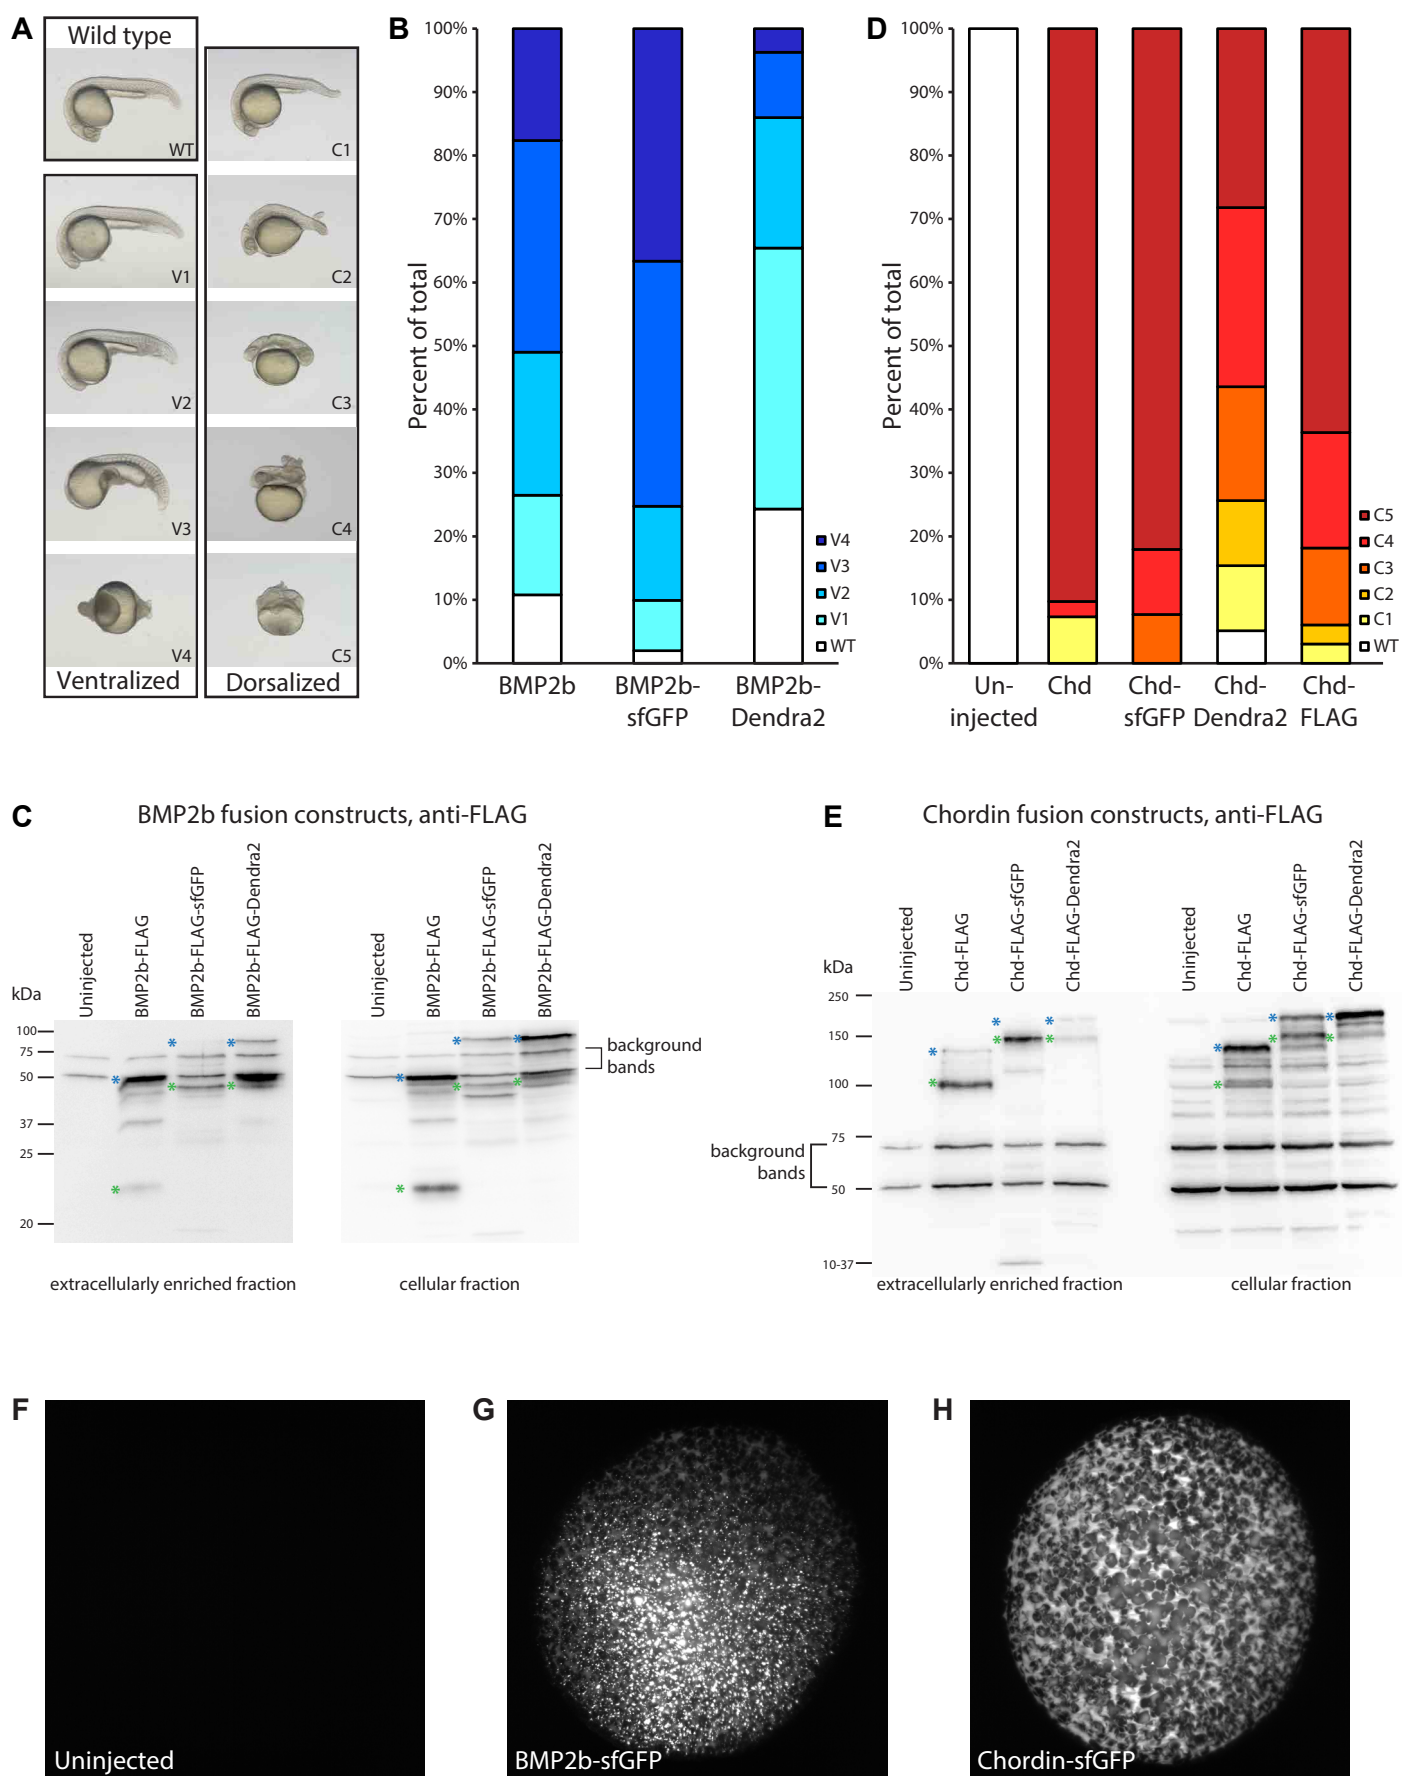

Figure 3 - figure supplement 1

Supplement: supp [file elife-25861-supp-v1.zip › elife_poa_e25861_Figure_3_figure_supplement_1.pdf]

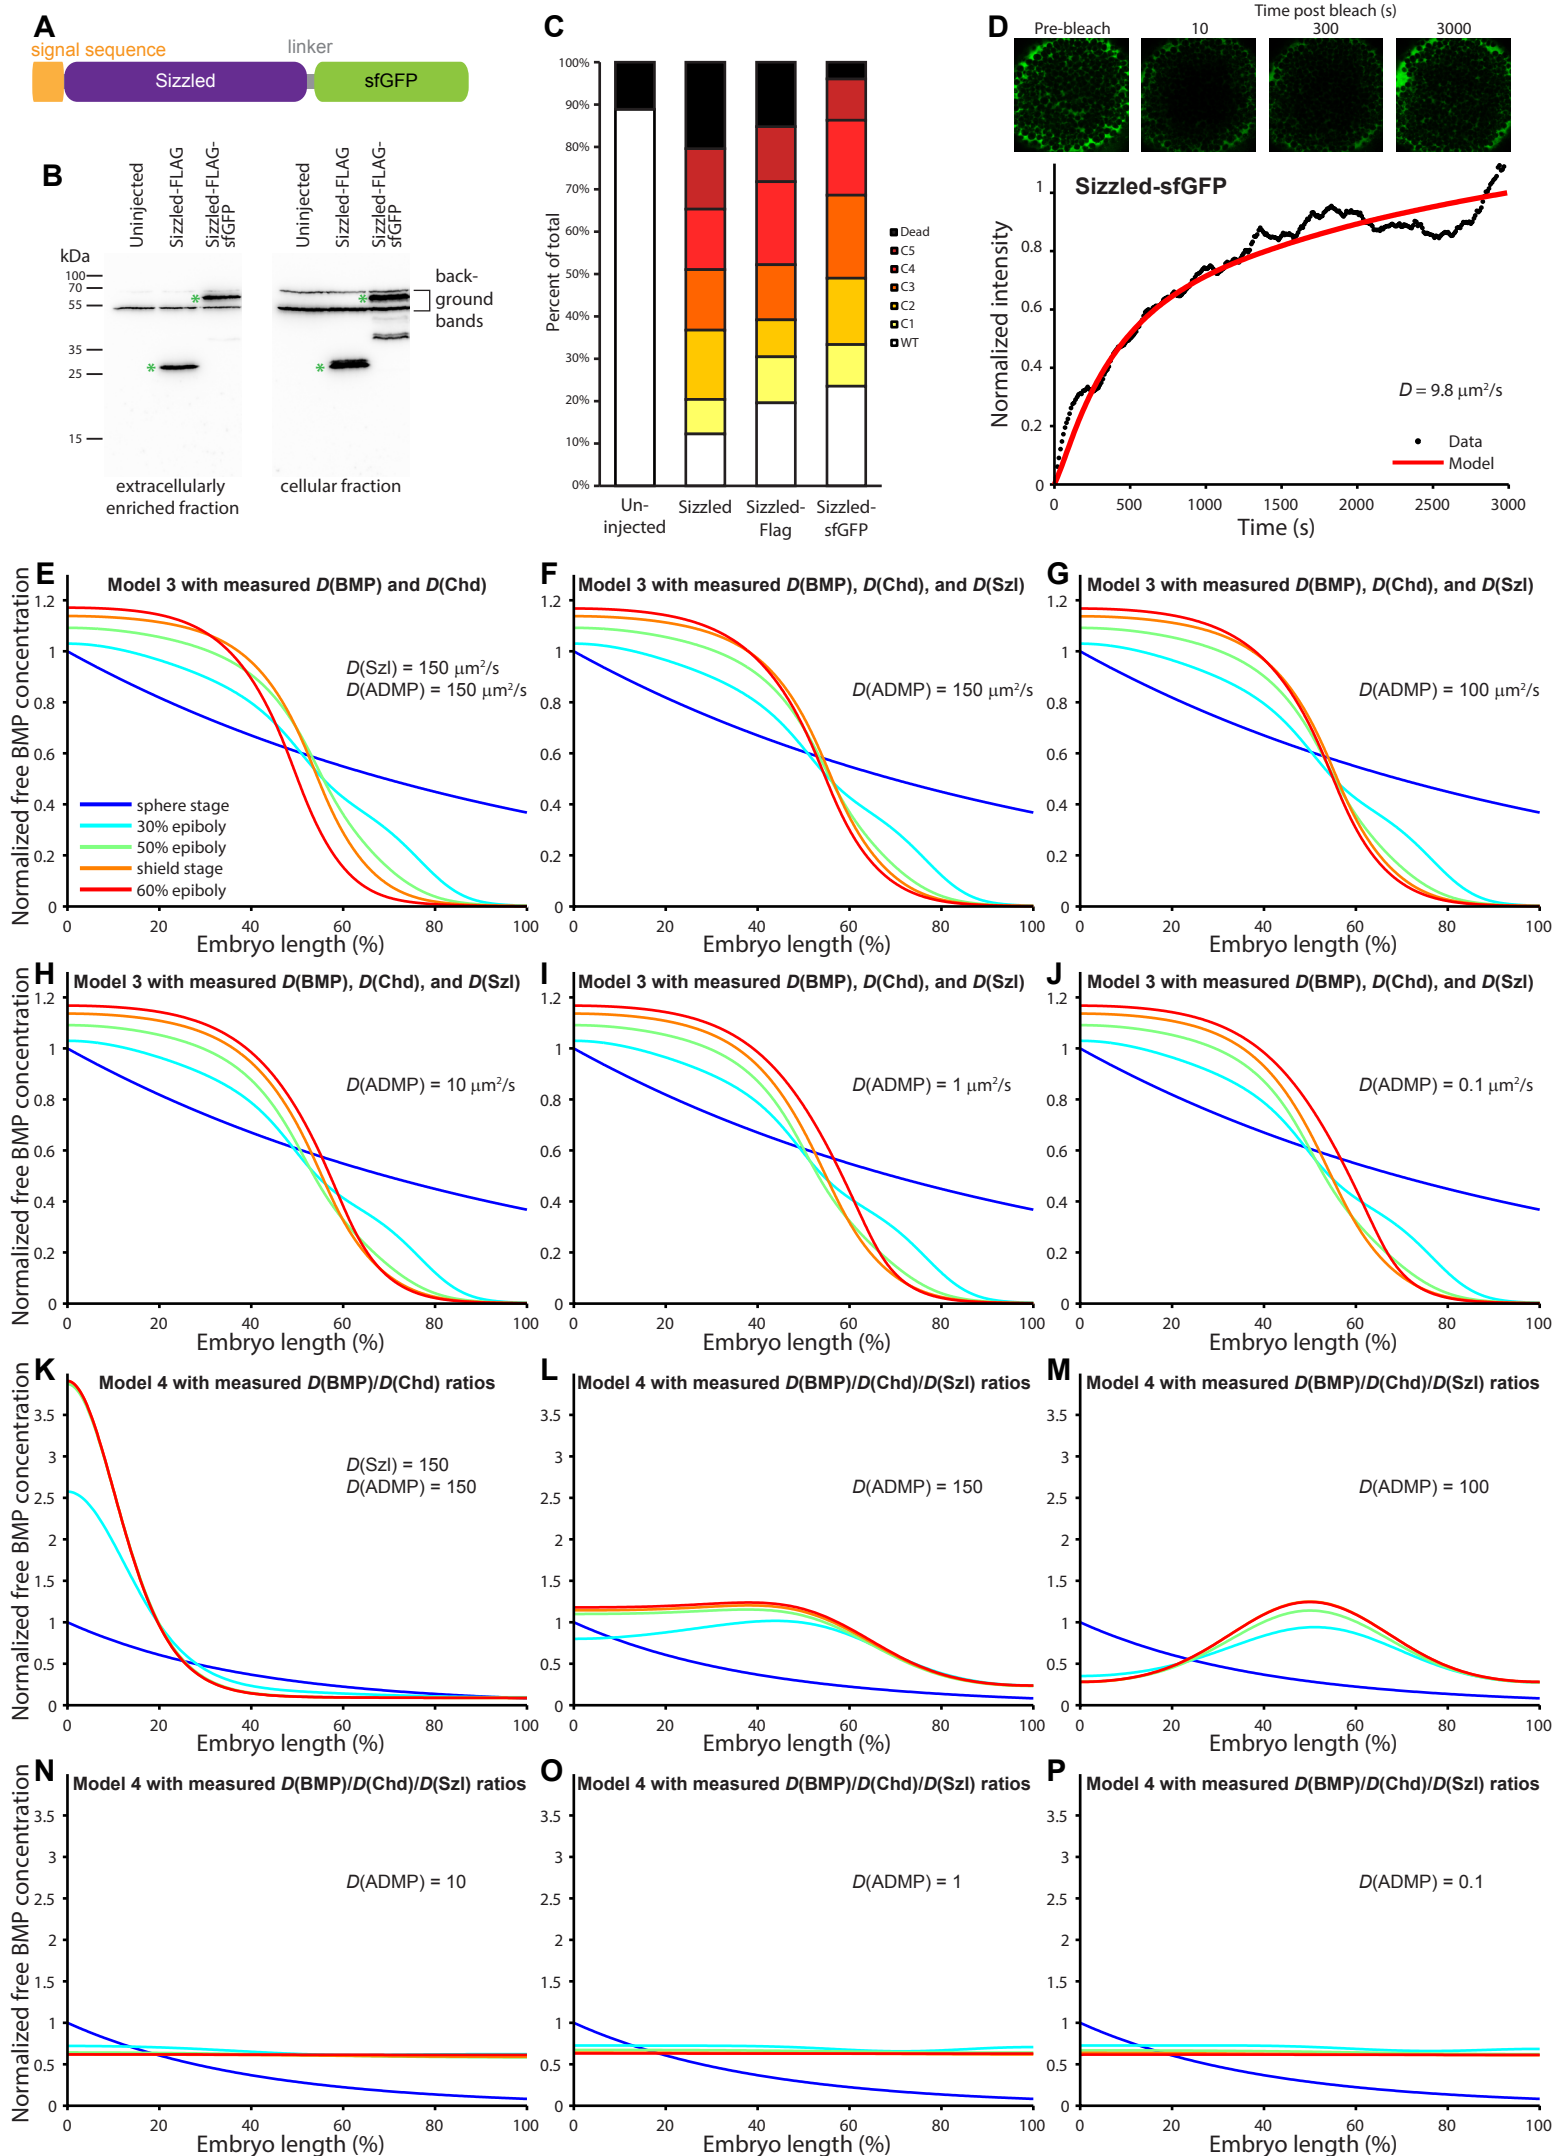

**Figure 4 - figure supplement 1**

Supplement: supp [file elife-25861-supp-v1.zip › elife_poa_e25861_Figure_4_figure_supplement_1.pdf]
